# Supplementary material for: Cancer subtype identification using somatic mutation data
Source: Springer Nature journal article supplement (doi:10.1038/s41416-018-0109-7), 2018-05-01
Supplement: MOESM2 [file 41416_2018_109_MOESM2_ESM.pdf]

Download mutation data from TCGA

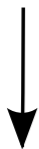

47 .maf files  
23 cancer types  
6,406 samples

Select non-synonymous mutations  
Correct for gene length  
Select primary tumors, merge duplicates

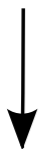

5,992 samples  
19,065 genes

Select cancer-associated genes  
Filter for samples without mutations

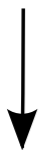

5,884 samples  
2,219 genes

De-sparsify data using biological pathways  
Filter samples with no pathway mutations

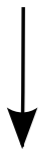

5,805 samples  
2,219 genes  
1,135 pathways

Correct for sample's mutation rate
