# Supplementary material for: Cancer subtype identification using somatic mutation data
Source: Springer Nature journal article supplement (doi:10.1038/s41416-018-0109-7), 2018-05-01

**A** Gene mutation scores

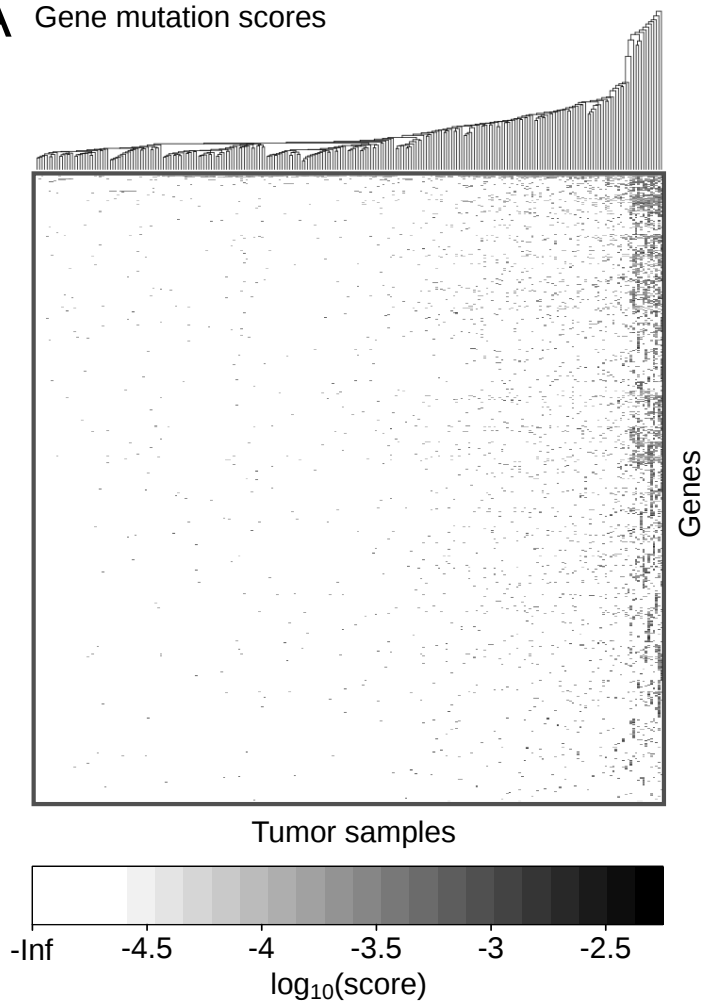

**B** Gene mutation scores  
Corrected for mutation rate

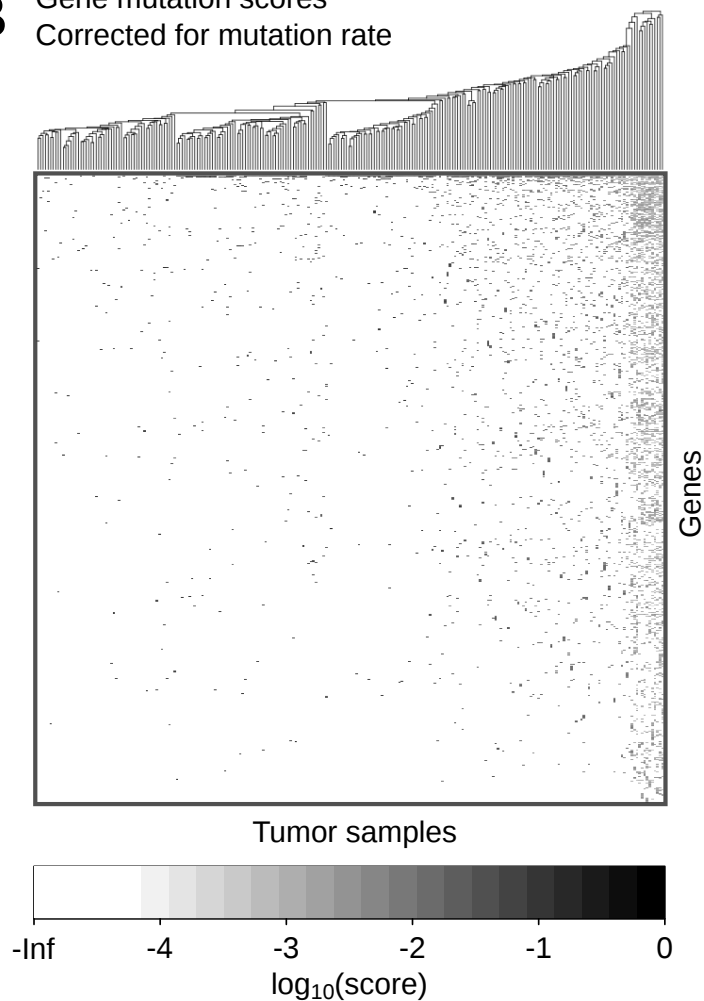

**C** Pathway mutation scores

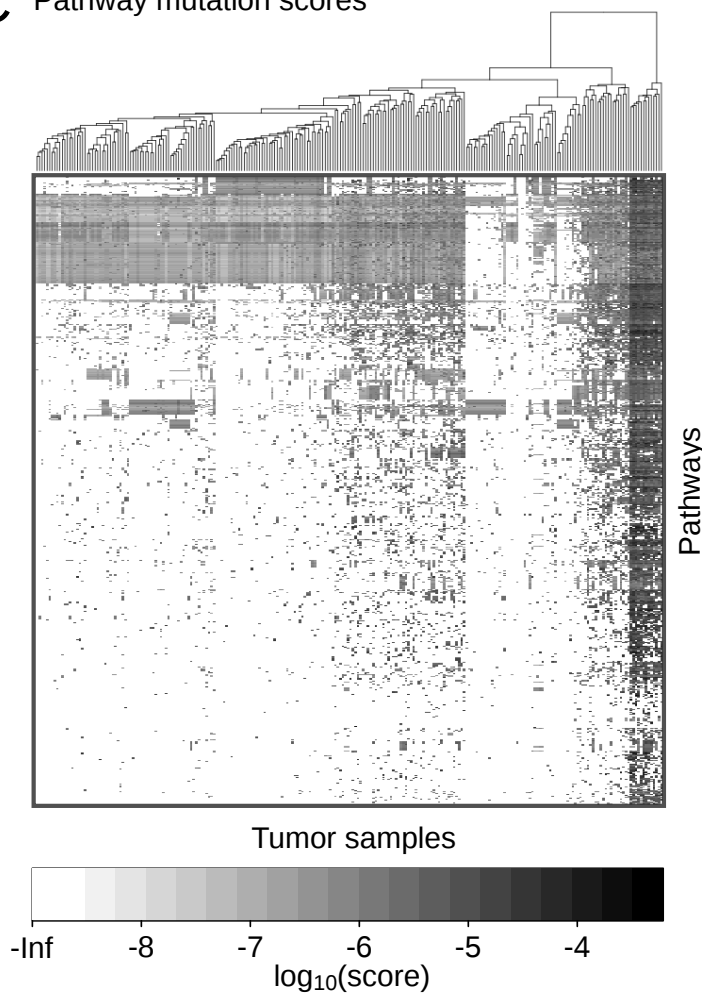

**D** Pathway mutation scores  
Corrected for mutation rate

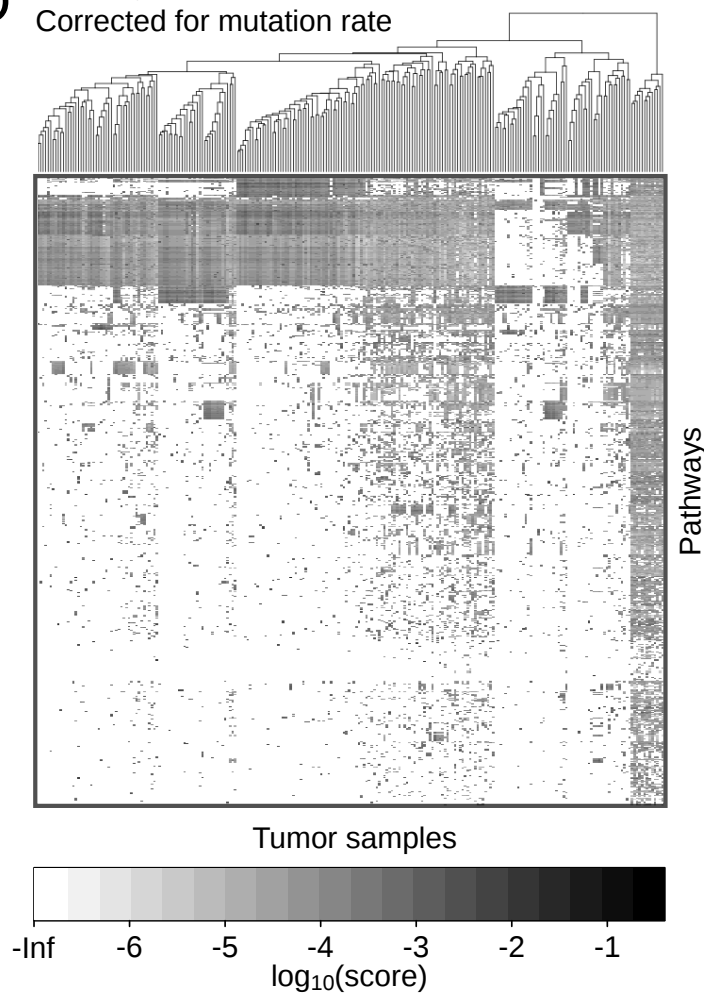

Supplement: MOESM3 [file 41416_2018_109_MOESM3_ESM.pdf]
