# Supplementary material for: Cancer subtype identification using somatic mutation data
Source: Springer Nature journal article supplement (doi:10.1038/s41416-018-0109-7), 2018-05-01

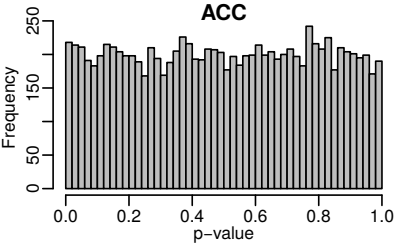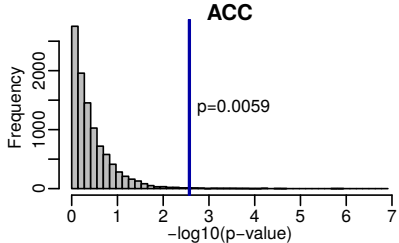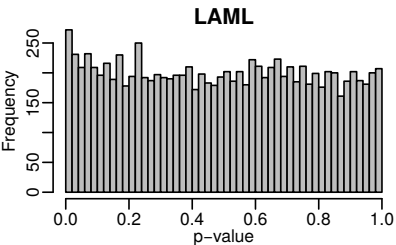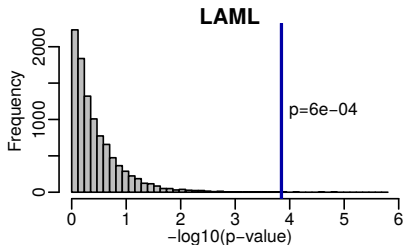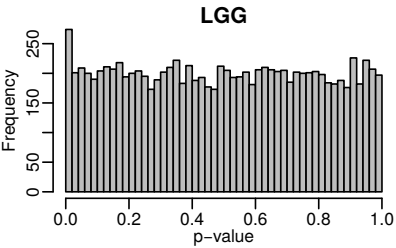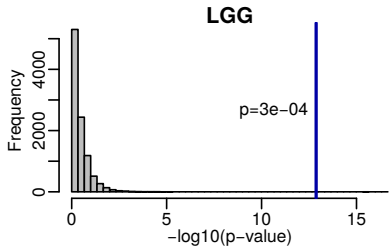

Supplement: MOESM4 [file 41416_2018_109_MOESM4_ESM.pdf]
