# Supplementary material for: Cancer subtype identification using somatic mutation data
Source: Springer Nature journal article supplement (doi:10.1038/s41416-018-0109-7), 2018-05-01

**A**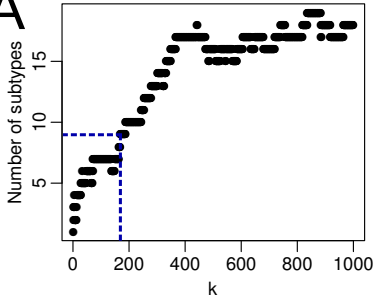**B**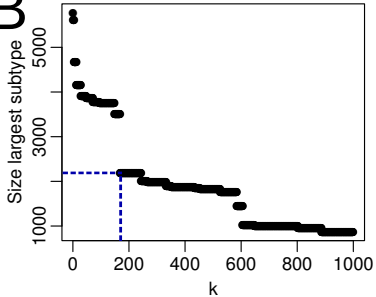

Supplement: MOESM5 [file 41416_2018_109_MOESM5_ESM-1.pdf]
